# Supplementary material for: Eight homodinuclear lanthanide complexes prepared from a quinoline based ligand: structural diversity and single-molecule magnetism behaviour
Source: Royal Society of Chemistry journal article supplement (doi:10.1039/c7nj04622g), 2018-01-01
Supplement: c7nj04622g1.pdf [file c7nj04622g1.pdf]

---

## Supporting Information

### **Eight homodinuclear lanthanide complexes prepared from a quinoline based ligand: structural diversity and single-molecule magnetism behaviour**

Yangdan Pan,<sup>a</sup> Haifeng Zhang,<sup>a</sup> Yaru Qin,<sup>a</sup> Yu Ge,<sup>a</sup> Yanfeng Cui,<sup>a</sup> Yahong Li,<sup>\*a</sup> Wei Liu,<sup>\*a</sup> and Yaping Dong<sup>b</sup>

<sup>a</sup> College of Chemistry, Chemical Engineering and Materials Science, Soochow University, Suzhou 215123, China. E-mail: liyahong@suda.edu.cn, weiliu@suda.edu.cn

<sup>b</sup> Key Laboratory of Salt Lake Resources and Chemistry, Qinghai Institute of Salt Lakes, Chinese Academy of Sciences, Xining 810008, P. R. China

|                                                                                                      |    |
|------------------------------------------------------------------------------------------------------|----|
| 1. <sup>1</sup> H and <sup>13</sup> C NMR spectra of the HL ligand.....                              | 2  |
| 2. Selected bond lengths and angles of <b>1-8</b> .....                                              | 3  |
| 3. IR spectra of the HL ligand and Complexes <b>1-8</b> .....                                        | 8  |
| 4. XRD patterns of complexes <b>1-8</b> .....                                                        | 13 |
| 5. The structures of complexes <b>3, 5, 7</b> and <b>8</b> .....                                     | 17 |
| 6. M-X bond lengths of complexes <b>1-8</b> .....                                                    | 21 |
| 7. Magnetic properties of complexes <b>6</b> and <b>7</b> .....                                      | 22 |
| 8. Frequency dependence of in-phase(a) and out-of-phase(b) ac susceptibility of complex <b>6</b> ... | 23 |
| 9. Parameters obtained from fitting the Cole-Cole plots of complex <b>6</b> .....                    | 24 |
| 10. Plot of ln $\tau$ vs 1/T of <b>6</b> .....                                                       | 25 |
| 11. Dy <sub>2</sub> SMMs reported in the literature .....                                            | 26 |

# 1. $^1\text{H}$ and $^{13}\text{C}$ NMR spectra of the HL ligand

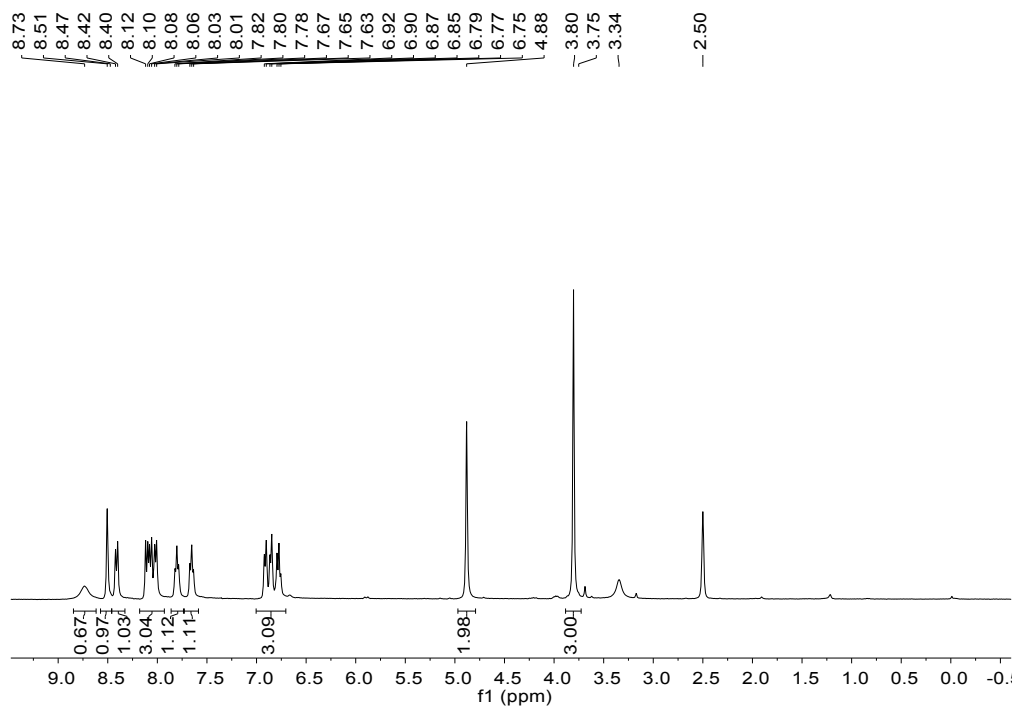

Fig. S1  $^1\text{H}$  NMR (300 MHz) spectrum of HL in DMSO.

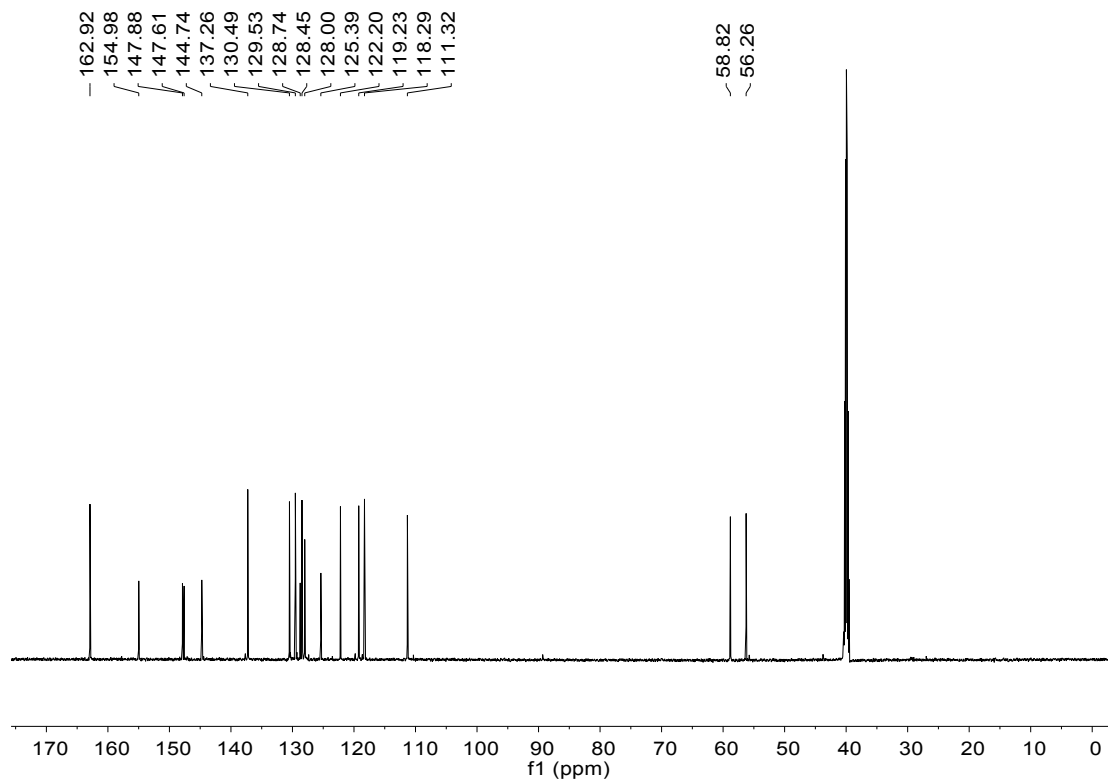

Fig. S2  $^{13}\text{C}$  NMR (300 MHz) spectrum of HL in DMSO.

---

## 2. Selected bond lengths and angles of 1-8

**Table S1** Selected Bond distances and bond angles for 1

| Atom | Atom | Length/Å  | Atom | Atom | Atom | Angle/°    |
|------|------|-----------|------|------|------|------------|
| Pr1  | N1   | 2.785(3)  | O4   | Pr1  | O7   | 68.39(9)   |
| Pr1  | N2   | 2.602(3)  | O4   | Pr1  | O10  | 136.70(9)  |
| Pr2  | N3   | 2.785(3)  | O4   | Pr1  | Pr2  | 113.72(7)  |
| Pr2  | N4   | 2.620(3)  | O6   | Pr1  | N1   | 92.70(10)  |
| Pr2  | N5   | 2.976(4)  | O6   | Pr1  | N7   | 152.85(10) |
| Pr1  | N7   | 2.984(3)  | O7   | Pr1  | O6   | 105.00(9)  |
| Pr1  | O1   | 2.552(3)  | O7   | Pr1  | O10  | 73.30(9)   |
| Pr1  | O2   | 2.593(3)  | O7   | Pr1  | Pr2  | 89.34(6)   |
| Pr1  | O4   | 2.518(3)  | O8   | Pr1  | N1   | 151.61(8)  |
| Pr1  | O6   | 2.695(3)  | O8   | Pr1  | N2   | 125.59(9)  |
| Pr1  | O7   | 2.667(2)  | O8   | Pr1  | O10  | 64.41(8)   |
| Pr1  | O8   | 2.406(2)  | O8   | Pr1  | Pr2  | 36.65(5)   |
| Pr2  | O8   | 2.359(2)  | O10  | Pr1  | N1   | 137.92(9)  |
| Pr1  | O10  | 2.723(3)  | O10  | Pr1  | N7   | 74.31(9)   |
| Pr2  | O10  | 2.722(3)  | O12  | Pr1  | O10  | 64.83(8)   |
| Pr2  | O11  | 2.548(3)  | O12  | Pr1  | Pr2  | 37.23(5)   |
| Pr1  | O12  | 2.384(2)  | N3   | Pr2  | N5   | 69.62(9)   |
| Pr2  | O12  | 2.388(2)  | N3   | Pr2  | Pr1  | 167.37(6)  |
| Pr2  | O13  | 2.745(2)  | N4   | Pr2  | N3   | 61.16(9)   |
| Pr2  | O15  | 2.562(3)  | O10  | Pr2  | Pr1  | 45.74(6)   |
| Pr2  | O16  | 2.621(3)  | O11  | Pr2  | N3   | 74.29(9)   |
| Pr2  | O18  | 2.606(3)  | O12  | Pr2  | Pr1  | 37.15(5)   |
| Pr1  | Pr2  | 3.8017(4) | O13  | Pr2  | N3   | 103.95(8)  |
|      |      |           | O16  | Pr2  | N3   | 83.39(9)   |

**Table S2** Selected Bond distances and bond angles for 2

| Atom | Atom | Length/Å | Atom | Atom | Atom | Angle/°    |
|------|------|----------|------|------|------|------------|
| Nd01 | O4   | 2.424(4) | O4   | Nd01 | O6   | 151.41(15) |
| Nd01 | O5   | 2.421(4) | O4   | Nd01 | O7   | 106.35(15) |
| Nd01 | O6   | 2.600(5) | O4   | Nd01 | O9   | 138.98(14) |
| Nd01 | O7   | 2.587(4) | O4   | Nd01 | O11  | 121.52(14) |
| Nd01 | O9   | 2.527(4) | O4   | Nd01 | O12  | 62.79(13)  |
| Nd01 | O11  | 2.544(4) | O5   | Nd01 | O4   | 67.79(13)  |
| Nd01 | O12  | 2.611(4) | O5   | Nd01 | O6   | 90.13(14)  |
| Nd01 | O14  | 2.552(4) | O5   | Nd01 | O7   | 77.22(14)  |

|      |     |          |     |      |      |            |
|------|-----|----------|-----|------|------|------------|
| Nd01 | O15 | 2.540(4) | 05  | Nd01 | O9   | 137.10(14) |
| Nd01 | O16 | 2.557(4) | 06  | Nd01 | O12  | 108.27(15) |
| Nd01 | N3  | 2.953(5) | 06  | Nd01 | N3   | 70.84(15)  |
| Nd01 | N4  | 2.961(5) | 06  | Nd01 | N4   | 140.44(16) |
| Nd02 | O1  | 2.547(4) | 07  | Nd01 | N3   | 97.54(15)  |
| Nd02 | O2  | 2.513(4) | 07  | Nd01 | N4   | 166.56(16) |
| Nd02 | O4  | 2.398(4) | 09  | Nd01 | O6   | 69.62(15)  |
| Nd02 | O5  | 2.404(4) | 09  | Nd01 | O7   | 110.78(15) |
| Nd02 | N5  | 2.965(5) | 09  | Nd01 | N3   | 25.08(15)  |
| Nd02 | N6  | 2.575(5) | 09  | Nd01 | N4   | 73.00(14)  |
| Nd02 | N7  | 2.820(5) | O11 | Nd01 | O6   | 73.78(15)  |
| Nd02 | N8  | 2.869(5) | O11 | Nd01 | O7   | 81.32(15)  |
| Nd02 | N9  | 2.572(5) | O4  | Nd02 | N10  | 74.88(15)  |
| Nd02 | N10 | 2.574(5) | 05  | Nd02 | Nd01 | 35.02(9)   |
|      |     |          | 05  | Nd02 | O1   | 70.71(13)  |

**Table S3** Selected Bond distances and bond angles for **3**

| Atom | Atom | length   | Atom | Atom | Atom | Angle/°    |
|------|------|----------|------|------|------|------------|
| Sm01 | O2   | 2.504(4) | N1   | Sm1  | N3   | 61.52(14)  |
| Sm01 | O3   | 2.513(3) | N1   | Sm1  | N10  | 75.04(14)  |
| Sm01 | O4   | 2.524(4) | N1   | Sm1  | Sm2  | 150.04(10) |
| Sm01 | O6   | 2.505(3) | N2   | Sm1  | N1   | 62.54(16)  |
| Sm01 | O7   | 2.572(4) | N2   | Sm1  | N3   | 83.38(16)  |
| Sm01 | O8   | 2.558(4) | N2   | Sm1  | N4   | 142.85(17) |
| Sm01 | O10  | 2.547(3) | N2   | Sm1  | N5   | 80.47(18)  |
| Sm01 | O11  | 2.384(3) | N2   | Sm1  | N10  | 103.90(16) |
| Sm01 | O12  | 2.394(3) | N2   | Sm1  | Sm2  | 107.57(12) |
| Sm01 | O13  | 2.605(3) | N3   | Sm1  | N10  | 126.39(14) |
| Sm01 | N2   | 2.924(4) | N3   | Sm1  | Sm2  | 148.26(10) |
| Sm01 | N4   | 2.931(4) | N4   | Sm1  | N1   | 92.43(16)  |
| Sm02 | O11  | 2.382(3) | N4   | Sm1  | N3   | 59.92(16)  |
| Sm02 | O12  | 2.365(3) | N4   | Sm1  | N10  | 94.43(16)  |
| Sm02 | O14  | 2.520(3) | N4   | Sm1  | Sm2  | 107.07(11) |
| Sm02 | O16  | 2.476(3) | N5   | Sm1  | N1   | 120.73(16) |
| Sm02 | N5   | 2.939(4) | N5   | Sm1  | N3   | 70.13(16)  |
| Sm02 | N6   | 2.548(4) | N5   | Sm1  | N4   | 91.35(18)  |
| Sm02 | N7   | 2.867(4) | N5   | Sm1  | N10  | 162.99(16) |
| Sm02 | N8   | 2.530(4) | N5   | Sm1  | Sm2  | 82.17(12)  |
| Sm02 | N9   | 2.798(4) | N10  | Sm1  | Sm2  | 80.84(10)  |
| Sm02 | N10  | 2.537(4) | O3   | Sm1  | N4   | 69.10(15)  |

|     |     |    |            |
|-----|-----|----|------------|
| 014 | Sm2 | 07 | 107.55(16) |
| 015 | Sm2 | N6 | 166.99(17) |
| 015 | Sm2 | N7 | 98.41(16)  |
| 015 | Sm2 | 07 | 65.85(17)  |

**Table S4** Selected Bond distances and bond angles for **4**

| Atom | Atom | Length/Å  | Atom | Atom | Atom | Angle/°  |
|------|------|-----------|------|------|------|----------|
| Eu1  | O1   | 2.500(7)  | O1   | Eu1  | O3   | 50.6(2)  |
| Eu1  | O3   | 2.521(7)  | O1   | Eu1  | O4   | 80.3(2)  |
| Eu1  | O4   | 2.531(7)  | O1   | Eu1  | O7   | 75.1(2)  |
| Eu1  | O6   | 2.499(7)  | O1   | Eu1  | O10  | 67.2(2)  |
| Eu1  | O7   | 2.529(7)  | O1   | Eu1  | O17  | 115.5(2) |
| Eu1  | O8   | 2.493(7)  | O3   | Eu1  | O4   | 115.8(2) |
| Eu1  | O10  | 2.557(6)  | O3   | Eu1  | O7   | 72.6(2)  |
| Eu1  | O11  | 2.350(5)  | O3   | Eu1  | O10  | 114.4(2) |
| Eu1  | O16  | 2.349(6)  | O3   | Eu1  | O17  | 69.3(2)  |
| Eu1  | O17  | 2.635(6)  | O4   | Eu1  | O10  | 64.9(2)  |
| Eu2  | O11  | 2.425(6)  | O4   | Eu1  | O17  | 111.7(2) |
| Eu2  | O12  | 2.406(6)  | O6   | Eu1  | O7   | 143.6(2) |
| Eu2  | O13  | 2.453(6)  | O6   | Eu1  | O10  | 107.7(2) |
| Eu2  | O14  | 2.570(6)  | O11  | Eu2  | O14  | 110.3(2) |
| Eu2  | O16  | 2.333(5)  | O11  | Eu2  | N5   | 136.8(2) |
| Eu2  | N5   | 2.503(7)  | O11  | Eu2  | N6   | 158.9(2) |
| Eu2  | N6   | 2.747(7)  | O11  | Eu2  | N7   | 73.0(2)  |
| Eu2  | N7   | 2.540(6)  | O12  | Eu2  | O13  | 152.5(2) |
| Eu1  | Eu2  | 3.856(13) | O12  | Eu2  | O14  | 147.0(2) |
|      |      |           | O13  | Eu2  | N5   | 125.1(2) |
|      |      |           | O13  | Eu2  | N6   | 84.4(2)  |
|      |      |           | O16  | Eu2  | N6   | 126.5(2) |
|      |      |           | O16  | Eu2  | N7   | 141.3(2) |

**Table S5** Selected Bond distances and bond angles for **5**

| Atom | Atom             | Length/Å   | Atom | Atom | Atom             | Angle/°    |
|------|------------------|------------|------|------|------------------|------------|
| Tb1  | Tb1 <sup>1</sup> | 3.7393(10) | O1   | Tb1  | Tb1 <sup>1</sup> | 89.98(10)  |
| Tb1  | O1               | 2.456(4)   | O1   | Tb1  | O3               | 52.22(14)  |
| Tb1  | O3               | 2.461(4)   | O1   | Tb1  | O4               | 152.39(15) |
| Tb1  | O4               | 2.532(4)   | O3   | Tb1  | N4               | 148.99(14) |
| Tb1  | O6               | 2.466(4)   | O4   | Tb1  | Tb1 <sup>1</sup> | 73.76(10)  |
| Tb1  | O7 <sup>1</sup>  | 2.344(3)   | O4   | Tb1  | N1               | 122.54(14) |
| Tb1  | O7               | 2.317(3)   | O6   | Tb1  | N4               | 25.97(14)  |

|                  |                 |          |                 |     |                  |            |
|------------------|-----------------|----------|-----------------|-----|------------------|------------|
| Tb1              | O8 <sup>1</sup> | 2.469(4) | O7              | Tb1 | Tb1 <sup>1</sup> | 36.91(8)   |
| Tb1              | N1              | 2.655(5) | O7 <sup>1</sup> | Tb1 | Tb1 <sup>1</sup> | 36.41(8)   |
| Tb1              | N2              | 2.445(4) | N2              | Tb1 | N1               | 65.77(16)  |
| Tb1              | N3              | 2.885(5) | N2              | Tb1 | N3               | 97.02(15)  |
| Tb1              | N4              | 2.915(5) | N2              | Tb1 | N4               | 81.64(15)  |
| Tb1 <sup>1</sup> | O7              | 2.344(3) | N3              | Tb1 | Tb1 <sup>1</sup> | 90.71(9)   |
| Tb1 <sup>1</sup> | O8              | 2.469(4) | N3              | Tb1 | N4               | 169.58(14) |
|                  |                 |          | N4              | Tb1 | Tb1 <sup>1</sup> | 99.29(11)  |

<sup>1</sup>1-X,1-Y,1-Z

**Table S6** Selected Bond distances and bond angles for **6**

| Atom | Atom             | Length/Å   | Atom            | Atom | Atom             | Angle/°   |
|------|------------------|------------|-----------------|------|------------------|-----------|
| Dy1  | Dy1 <sup>1</sup> | 3.7142(3)  | O1              | Dy1  | Dy1 <sup>1</sup> | 36.86(4)  |
| Dy1  | O1 <sup>1</sup>  | 2.3270(15) | O1 <sup>1</sup> | Dy1  | Dy1 <sup>1</sup> | 36.37(4)  |
| Dy1  | O1               | 2.3004(15) | O1              | Dy1  | O1 <sup>1</sup>  | 73.23(6)  |
| Dy1  | O2 <sup>1</sup>  | 2.4503(16) | O1              | Dy1  | O2 <sup>1</sup>  | 134.33(6) |
| Dy1  | O3               | 2.4386(17) | O2 <sup>1</sup> | Dy1  | Dy1 <sup>1</sup> | 101.26(4) |
| Dy1  | O4               | 2.4416(19) | O2 <sup>1</sup> | Dy1  | O7               | 73.29(6)  |
| Dy1  | O6               | 2.4461(18) | O2 <sup>1</sup> | Dy1  | N1               | 87.10(6)  |
| Dy1  | O7               | 2.5148(19) | O2 <sup>1</sup> | Dy1  | N3               | 107.16(7) |
| Dy1  | N1               | 2.646(2)   | O3              | Dy1  | O6               | 135.78(6) |
| Dy1  | N2               | 2.428(2)   | O3              | Dy1  | O7               | 152.52(6) |
| Dy1  | N3               | 2.867(2)   | O4              | Dy1  | O6               | 137.48(6) |
| Dy1  | N4               | 2.898(2)   | O4              | Dy1  | O7               | 147.36(6) |
| O1   | Dy1 <sup>1</sup> | 2.3270(15) | N1              | Dy1  | Dy1 <sup>1</sup> | 163.07(4) |
| O2   | Dy1 <sup>1</sup> | 2.4502(16) | N2              | Dy1  | O2 <sup>1</sup>  | 136.56(6) |
|      |                  |            | N2              | Dy1  | Dy1 <sup>1</sup> | 114.18(5) |

<sup>1</sup>1-X,1-Y,1-Z

**Table S7** Selected Bond distances and bond angles for **7**

| Atom | Atom             | Length/Å   | Atom            | Atom | Atom             | Angle/°   |
|------|------------------|------------|-----------------|------|------------------|-----------|
| Ho1  | Ho1 <sup>1</sup> | 3.7026(4)  | O1 <sup>1</sup> | Ho1  | Ho1 <sup>1</sup> | 101.50(5) |
| Ho1  | O1 <sup>1</sup>  | 2.438(2)   | O1 <sup>1</sup> | Ho1  | O3               | 73.52(8)  |
| Ho1  | O2 <sup>1</sup>  | 2.3203(19) | O1 <sup>1</sup> | Ho1  | O4               | 71.55(8)  |
| Ho1  | O2               | 2.2866(19) | O1 <sup>1</sup> | Ho1  | N1               | 86.49(8)  |
| Ho1  | O3               | 2.507(2)   | O2              | Ho1  | O1 <sup>1</sup>  | 134.62(7) |
| Ho1  | O4               | 2.440(2)   | O2              | Ho1  | O4               | 112.85(8) |
| Ho1  | O6               | 2.427(2)   | O2 <sup>1</sup> | Ho1  | O4               | 121.75(8) |
| Ho1  | O7               | 2.436(2)   | O3              | Ho1  | N1               | 123.33(8) |

|     |                  |            |    |     |                  |           |
|-----|------------------|------------|----|-----|------------------|-----------|
| Ho1 | N1               | 2.634(3)   | O3 | Ho1 | N4               | 163.83(7) |
| Ho1 | N2               | 2.415(3)   | O4 | Ho1 | Ho1 <sup>1</sup> | 124.72(6) |
| Ho1 | N3               | 2.896(3)   | O6 | Ho1 | N3               | 154.87(8) |
| Ho1 | N4               | 2.854(3)   | O7 | Ho1 | O4               | 137.42(8) |
| O1  | Ho1 <sup>1</sup> | 2.438(2)   | N1 | Ho1 | Ho1 <sup>1</sup> | 162.93(6) |
| O2  | Ho1 <sup>1</sup> | 2.3204(19) | N2 | Ho1 | O7               | 120.31(8) |

<sup>1</sup>1-X,1-Y,1-Z

**Table S8** Selected Bond distances and bond angles for **8**

| Atom | Atom             | Length/Å  | Atom            | Atom | Atom             | Angle/°    |
|------|------------------|-----------|-----------------|------|------------------|------------|
| Er1  | Er1 <sup>1</sup> | 3.6911(6) | O1              | Er1  | Er1 <sup>1</sup> | 124.98(12) |
| Er1  | O1               | 2.432(4)  | O1              | Er1  | O3               | 51.36(15)  |
| Er1  | O3               | 2.492(4)  | O1              | Er1  | N1               | 72.02(16)  |
| Er1  | O4               | 2.413(4)  | O3              | Er1  | Er1 <sup>1</sup> | 73.94(11)  |
| Er1  | O6               | 2.412(4)  | O3              | Er1  | N1               | 123.28(15) |
| Er1  | O7               | 2.266(3)  | O3              | Er1  | N3               | 26.02(14)  |
| Er1  | O7 <sup>1</sup>  | 2.311(3)  | O4              | Er1  | O1               | 137.37(15) |
| Er1  | O8 <sup>1</sup>  | 2.426(3)  | O4              | Er1  | O3               | 147.26(13) |
| Er1  | N1               | 2.615(5)  | O4              | Er1  | O8 <sup>1</sup>  | 80.38(14)  |
| Er1  | N2               | 2.404(4)  | O6              | Er1  | N3               | 154.00(13) |
| Er1  | N3               | 2.896(6)  | O6              | Er1  | N4               | 26.57(12)  |
| Er1  | N4               | 2.838(6)  | O7              | Er1  | Er1 <sup>1</sup> | 36.66(8)   |
| Er1  | Er1 <sup>1</sup> | 3.6911(6) | O8 <sup>1</sup> | Er1  | N4               | 106.48(15) |
|      |                  |           | N1              | Er1  | Er1 <sup>1</sup> | 162.67(11) |

<sup>1</sup>1-X,1-Y,1-Z

### 3. IR spectra of the HL ligand and Complexes 1-8

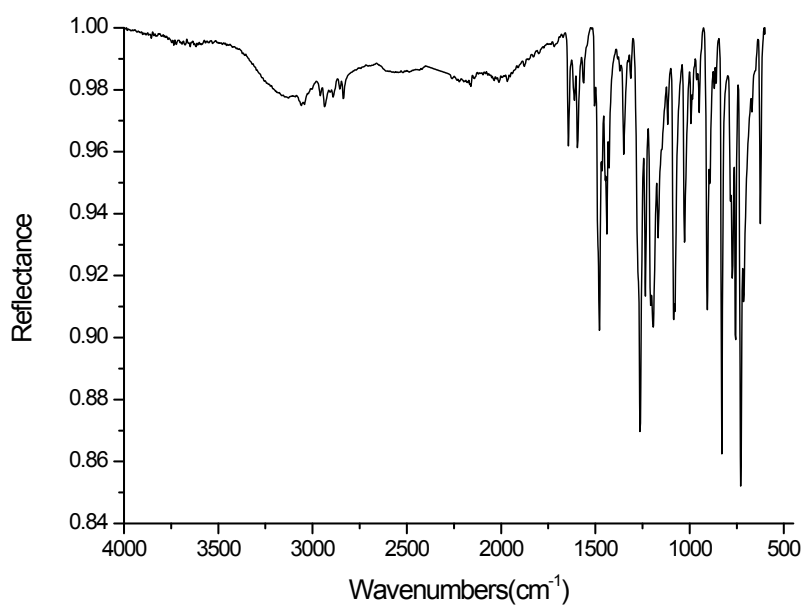

**Fig. S3** The IR spectrum of HL.

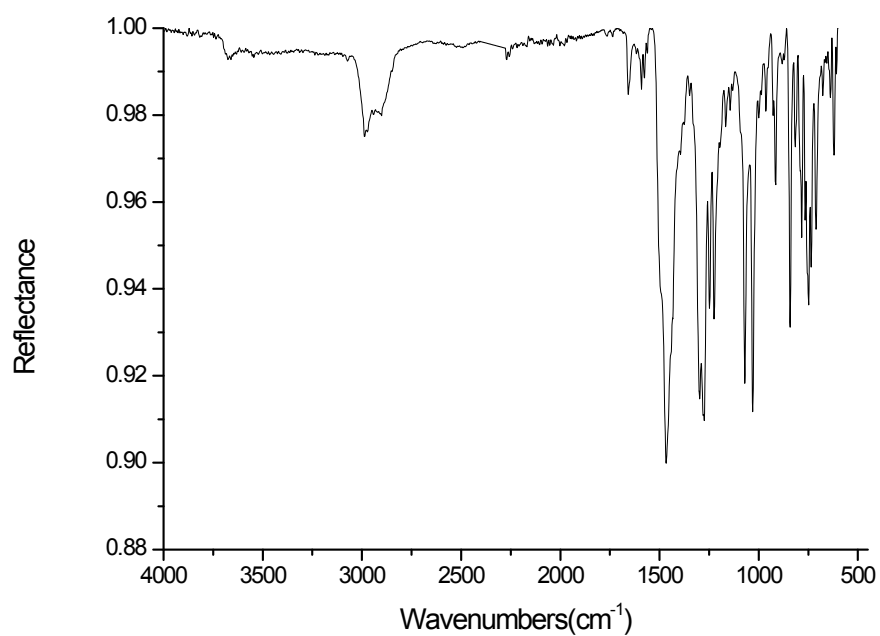

**Fig. S4** The IR spectrum of complex 1.



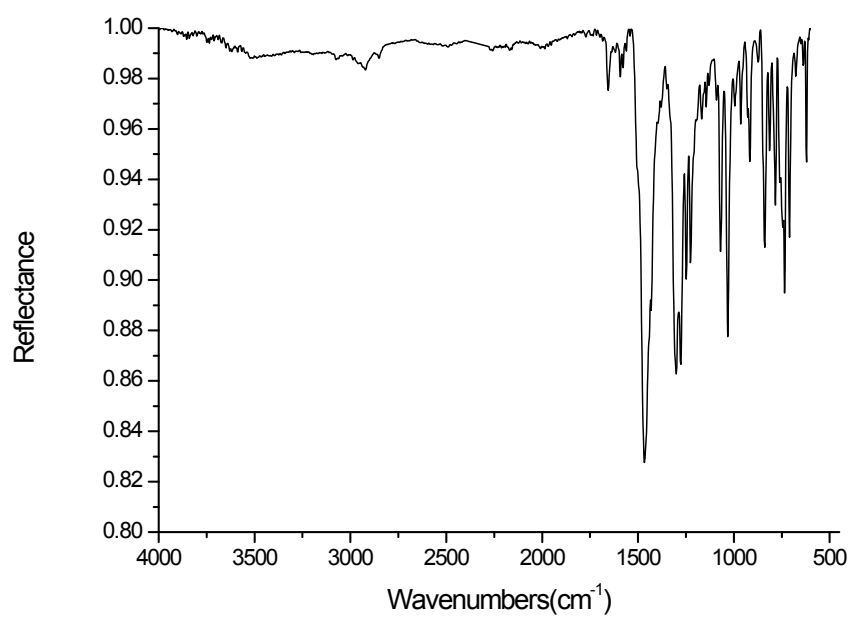

**Fig. S5** The IR spectrum of complex 2.

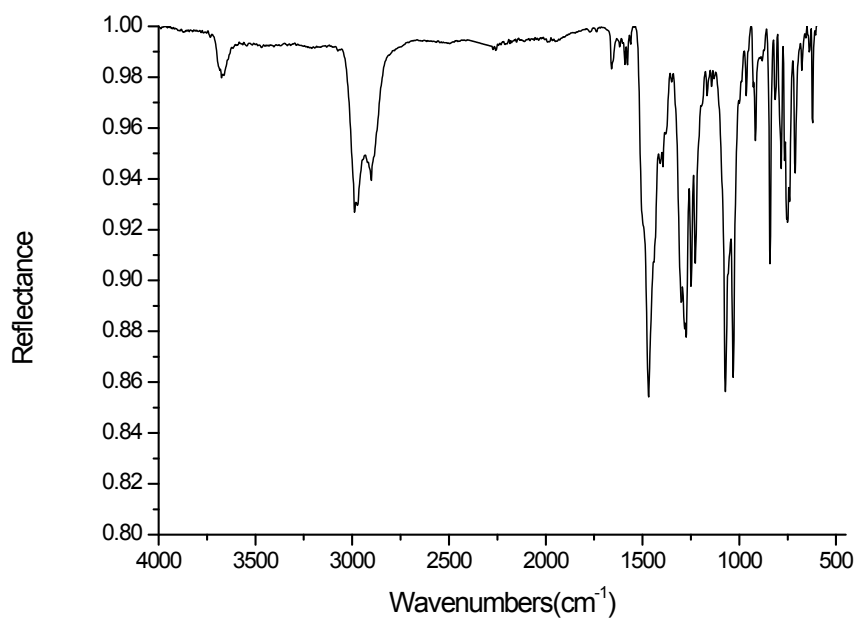

**Fig. S6** The IR spectrum of complex 3.

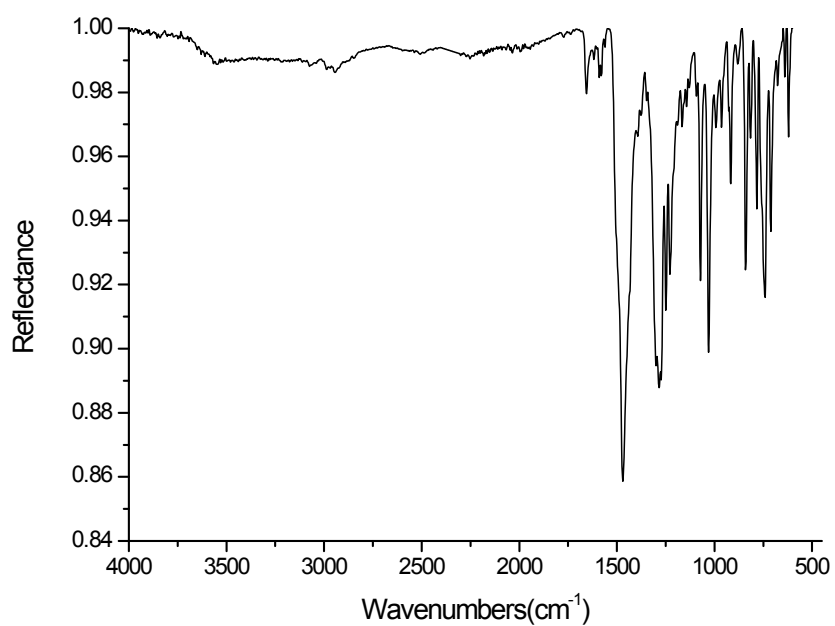

**Fig. S7** The IR spectrum of complex **4**.

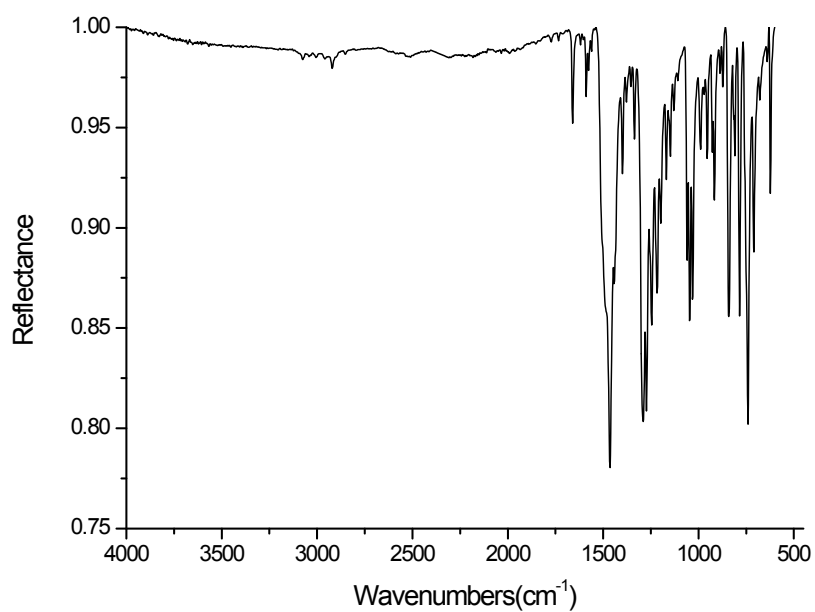

**Fig. S8** The IR spectrum of complex **5**.

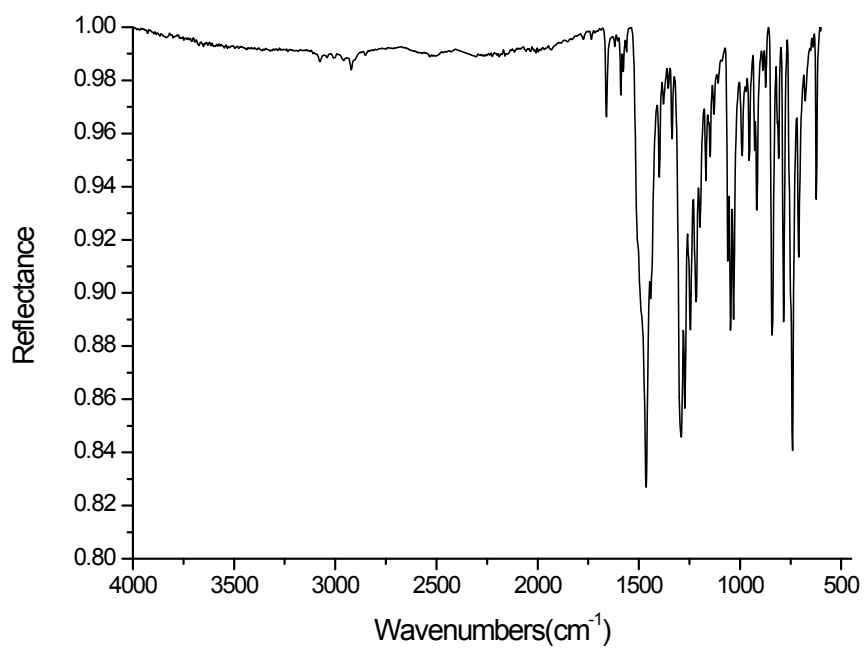

**Fig. S9** The IR spectrum of complex 6.

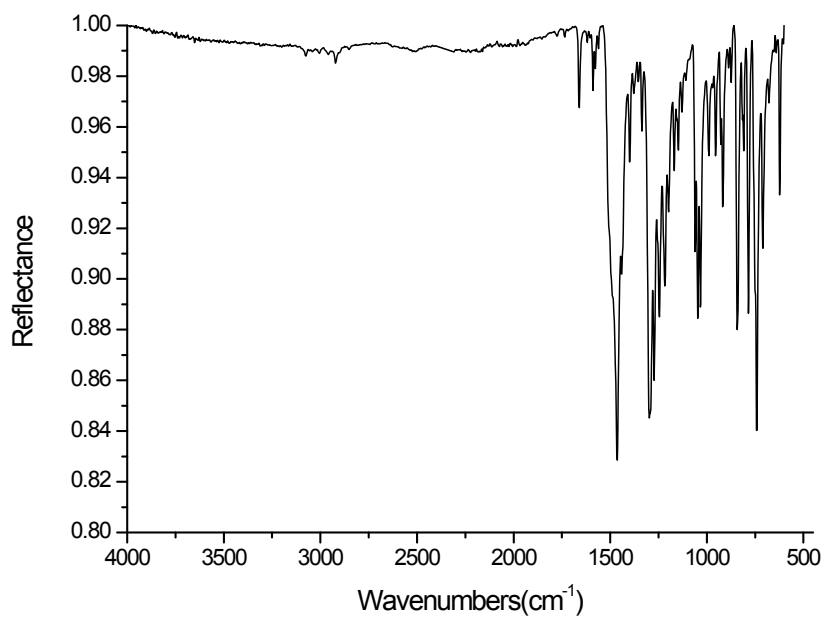

**Fig. S10** The IR spectrum of complex 7.

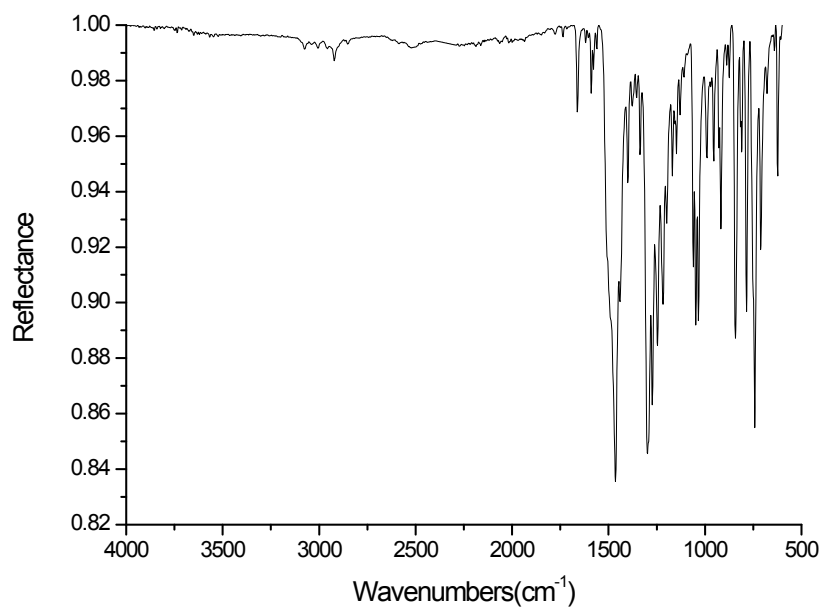

**Fig. S11** The IR spectrum of complex **8**.

---

#### 4. XRD patterns of complexes 1-8

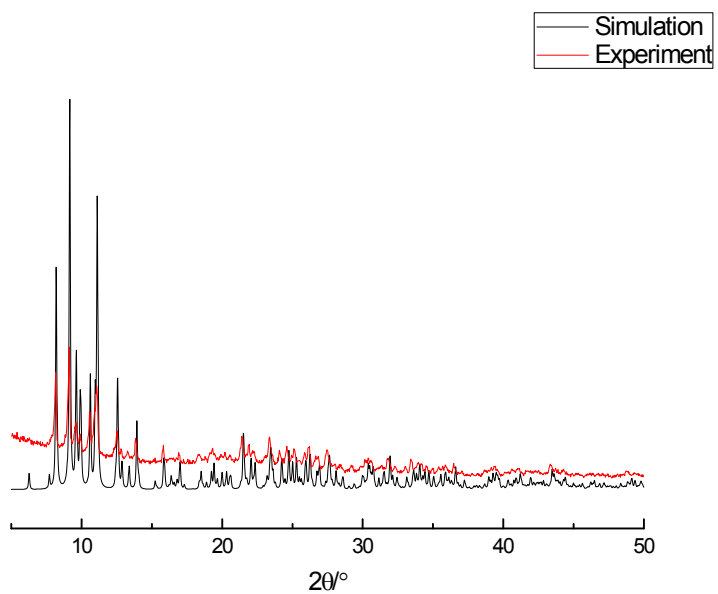

**Fig. S12** XRD patterns of **1**.

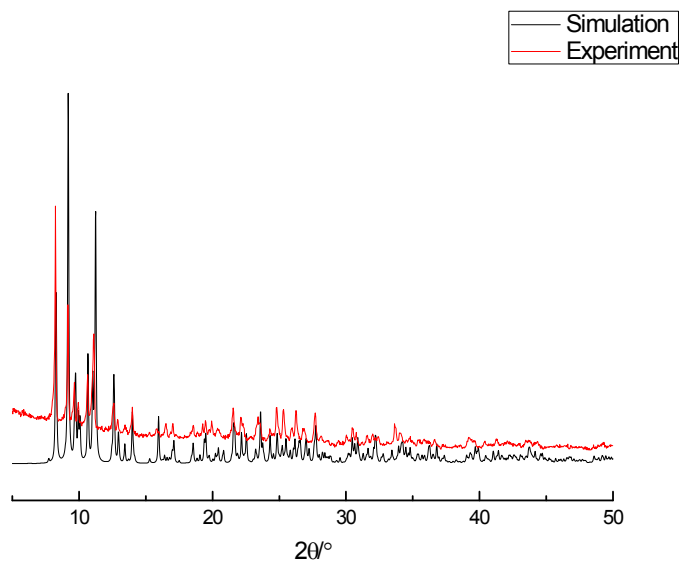

**Fig. S13** XRD patterns of **2**.

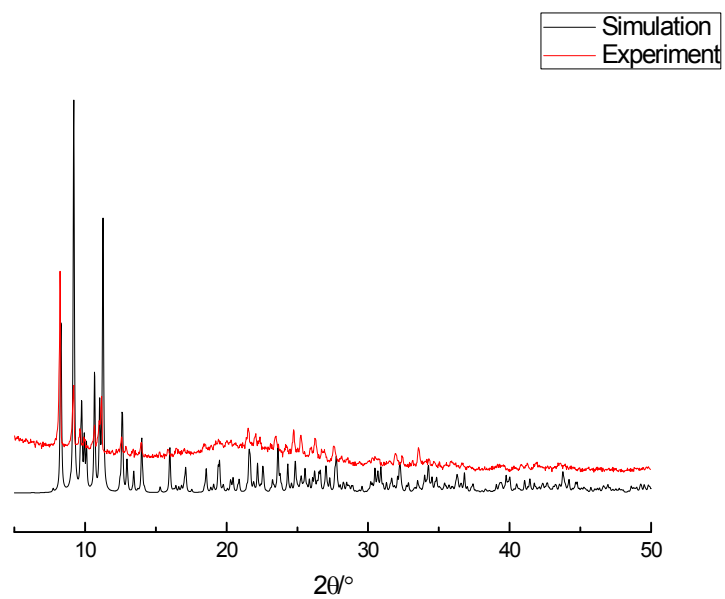

**Fig. S14** XRD patterns of **3**.

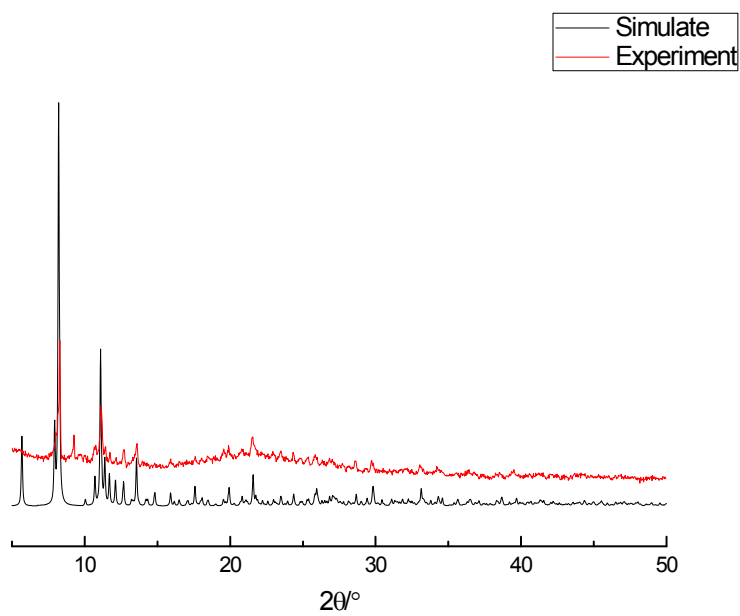

**Fig. S15** XRD patterns of **4**.

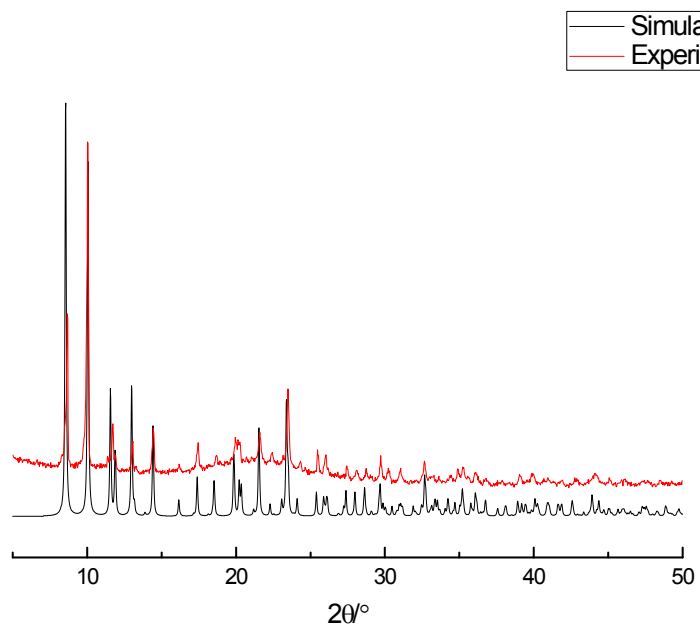

**Fig. S16** XRD patterns of **5**.

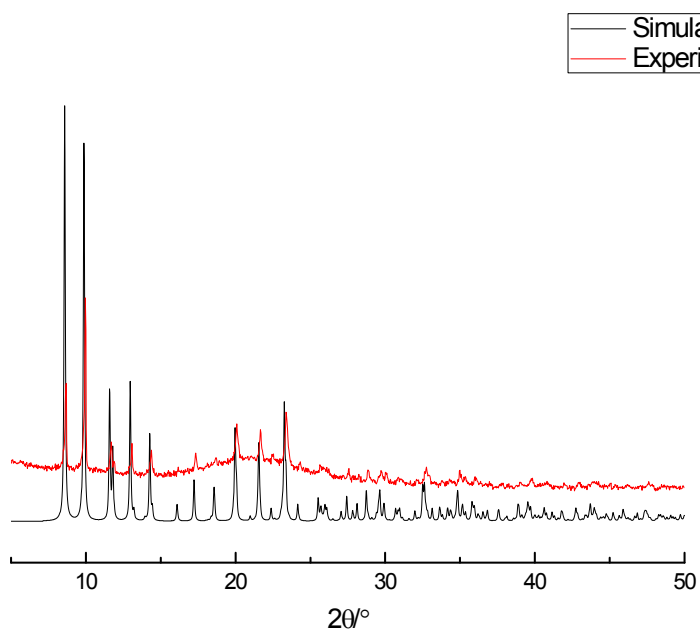

**Fig. S17** XRD patterns of **6**.

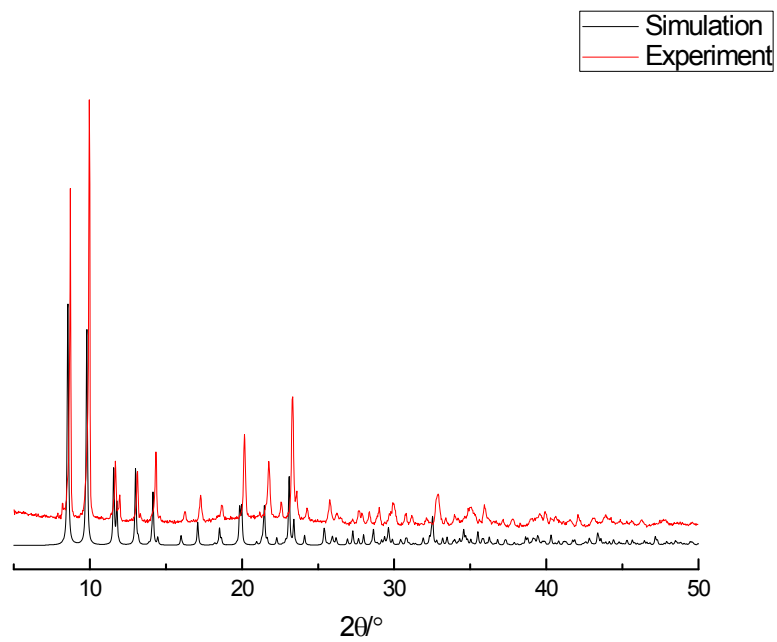

**Fig. S18** XRD patterns of **7**.

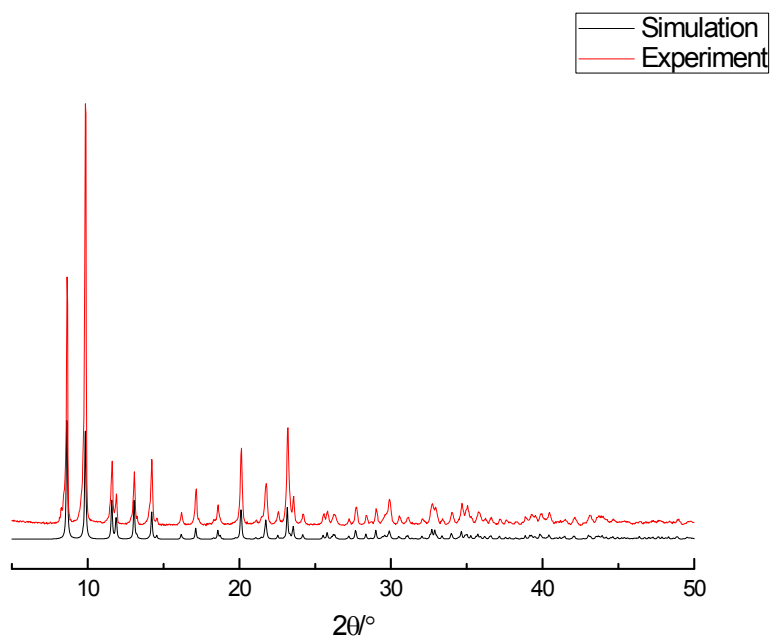

**Fig. S19** XRD patterns of **8**.



## 5. The structure of the other four complexes 3, 5, 7 and 8

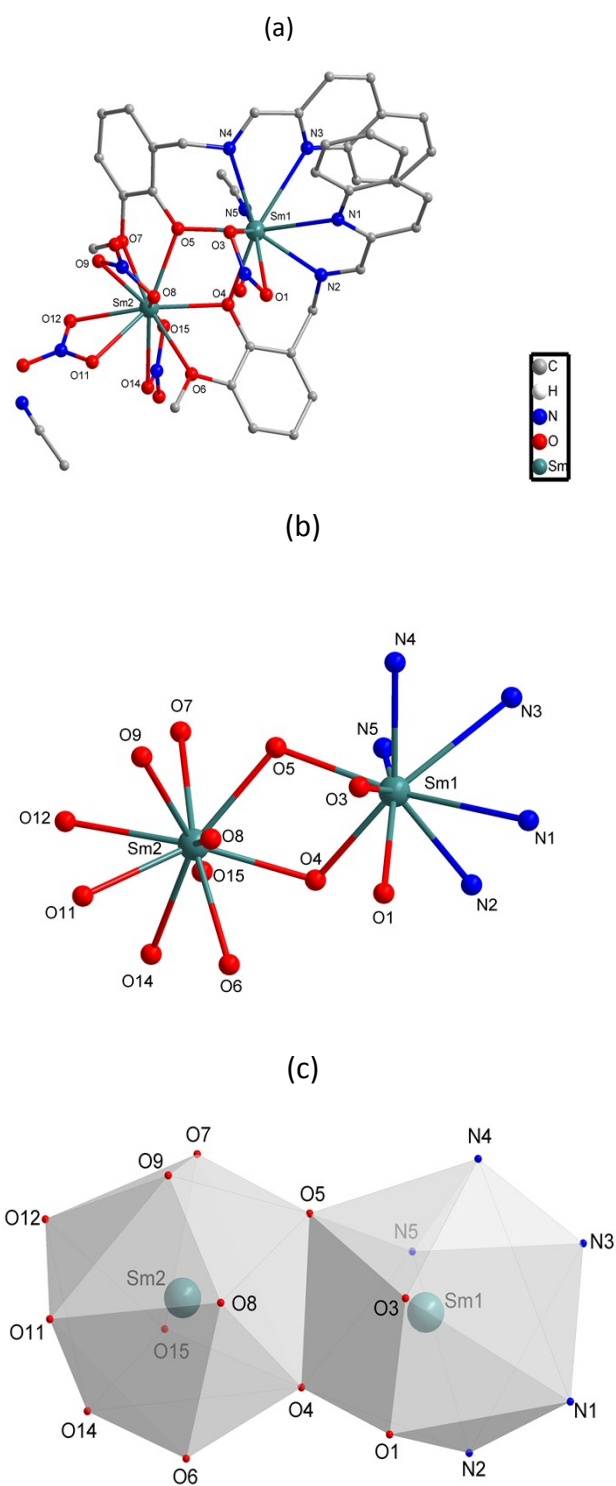

**Fig. S20** (a) Molecular structure of  $[\text{Sm}_2\text{L}_2(\text{NO}_3)_4(\text{CH}_3\text{CN})]\cdot\text{CH}_3\text{CN}$  (**3**). Hydrogen atoms have been omitted for clarity. (b) Dinuclear core structure of **3**. (c) Coordination polyhedrons of the  $\text{Sm}^{\text{III}}$  ions in **3**.

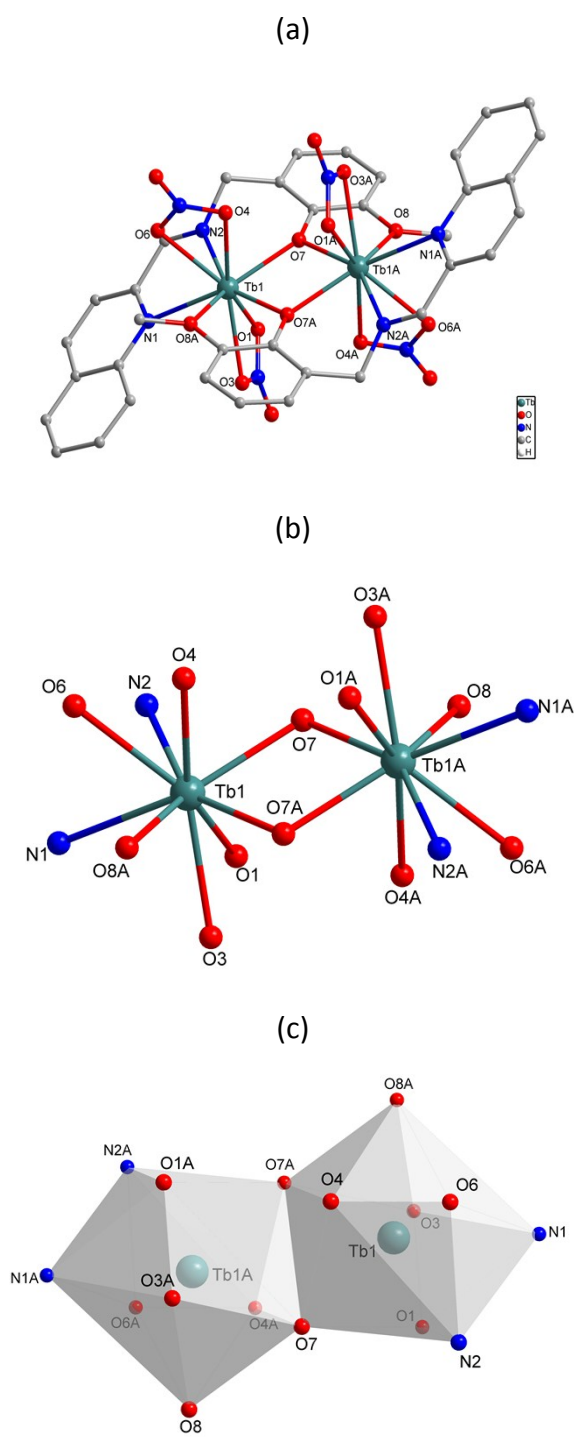

**Fig. S21** (a) Molecular structure of  $[\text{Tb}_2\text{L}_2(\text{NO}_3)_4]$  (**5**). Hydrogen atoms have been omitted for clarity. (b) Dinuclear core structure of **5**. (c) Coordination polyhedrons of the  $\text{Tb}^{\text{III}}$  ions in **5**.

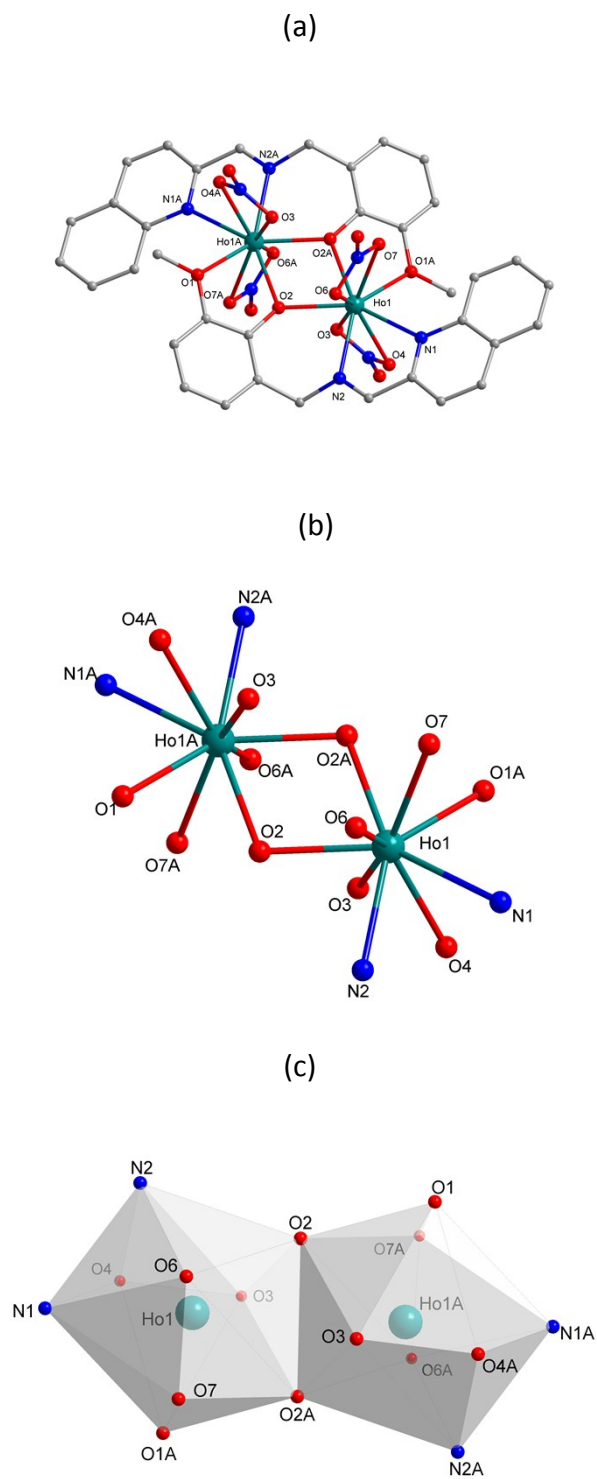

**Fig. S22** (a) Molecular structure of [Ho<sub>2</sub>L<sub>2</sub>(NO<sub>3</sub>)<sub>4</sub>] (7). Hydrogen atoms have been omitted for clarity. (b) Dinuclear core structure of 7. (c) Coordination polyhedrons of the Ho<sup>III</sup> ions in 7.

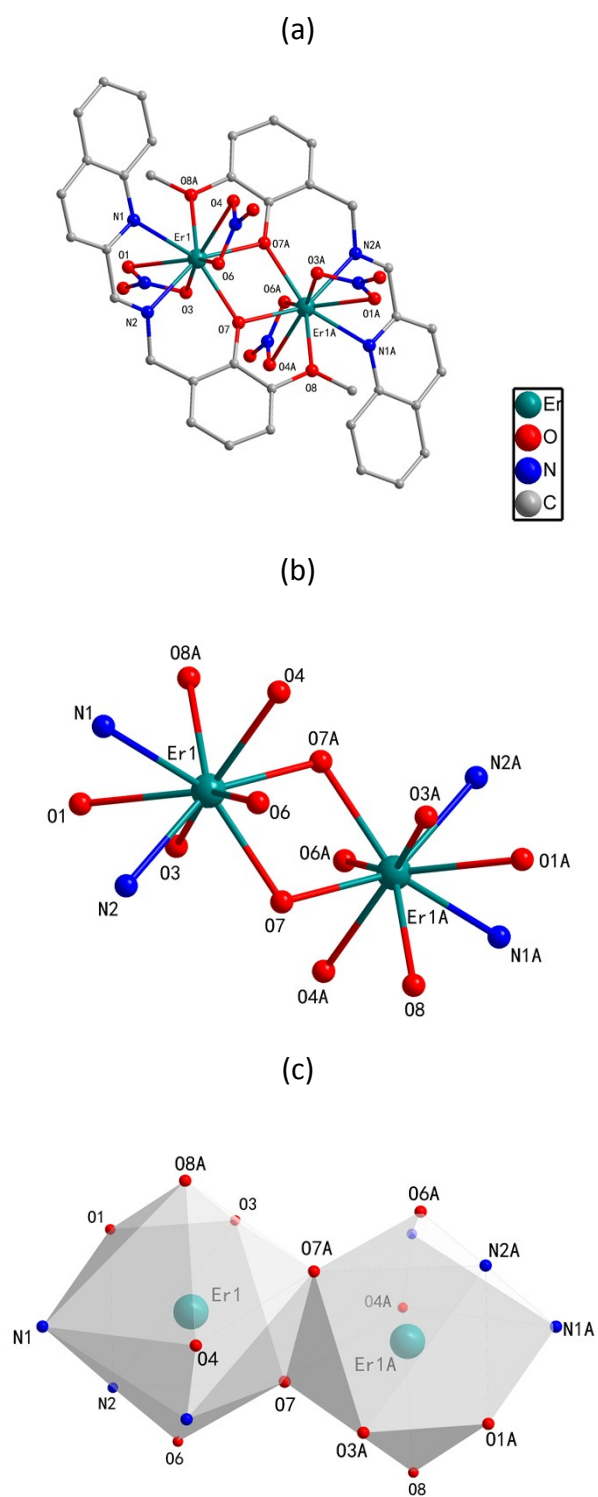

**Fig. S23** (a) Molecular structure of  $[\text{Er}_2\text{L}_2(\text{NO}_3)_3]$  (**8**). Hydrogen atoms have been omitted for clarity. (b) Dinuclear core structure of **8**. (c) Coordination polyhedrons of the  $\text{Er}^{\text{III}}$  ions in **8**.

---

## 6. M-X bond lengths of complexes 1-8

**Table S9** Bond lengths between metal centers and the coordinated atoms of HL ligands of complexes **1-8**

|             | M-N(py)   | M-N=C    | M-Oph                | M-OCH <sub>3</sub> | M-N(py)   | M-N=C    | M-Oph                | M-OCH <sub>3</sub> |
|-------------|-----------|----------|----------------------|--------------------|-----------|----------|----------------------|--------------------|
| <b>1-Pr</b> | 2.785(3)  | 2.602(3) | 2.384(2)/2.388(2) Å  | 2.745(2)           | 2.785(3)  | 2.620(3) | 2.406(2)/2.539(2) Å  | 2.667(2)           |
| <b>2-Nd</b> | 2.820(5)  | 2.572(5) | 2.404(4)/2.421(4) Å  | 2.557(4)           | 2.869(5)  | 2.575(5) | 2.398(4)/2.424(4) Å  | 2.611(4)           |
| <b>3-Sm</b> | 2.871(5)  | 2.550(5) | 2.365(4)/2.396(4) Å  | 2.604(5)           | 2.796(5)  | 2.535(5) | 2.385(4)/2.385(4) Å  | 2.548(4)           |
| <b>4-Eu</b> | 2.914(8)  | 2.540(6) | 2.425(6)/2.350(5) Å  | 2.557(6)           | 2.747(7)  | 2.503(7) | 2.333(5)/2.349(6) Å  | 2.635(6)           |
| <b>5-Tb</b> | 2.655(5)  | 2.445(4) | 2.317(3)/2.344(3) Å  | 2.469(4)           | 2.655(5)  | 2.445(4) | 2.317(3)/2.344(3) Å  | 2.469(4)           |
| <b>6-Dy</b> | 2.6646(2) | 2.428(2) | 2.3004(15)/2.327(15) | 2.450(16)          | 2.6646(2) | 2.428(2) | 2.3004(15)/2.327(15) | 2.450(16)          |
| <b>7-Ho</b> | 2.634(3)  | 2.415(3) | 2.2866(19)/2.320(19) | 2.438(2)           | 2.634(3)  | 2.415(3) | 2.2866(19)/2.320(19) | 2.438(2)           |
| <b>8-Er</b> | 2.615(5)  | 2.404(4) | 2.266(3)/2.311(3) Å  | 2.426(3)           | 2.615(5)  | 2.404(4) | 2.266(3)/2.311(3) Å  | 2.426(3)           |

## 7. Magnetic properties of complexes **6** and **7**

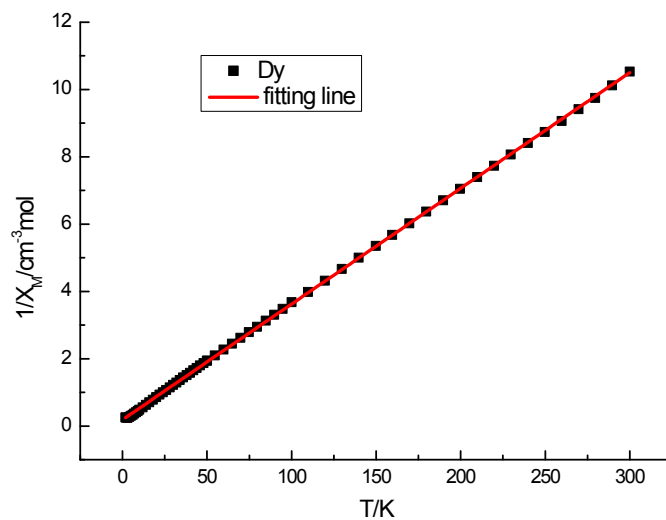

**Fig. S24** The plot of  $1/\chi_m$  versus  $T$  for **6** and the linear fit of Curie-Weiss law at 1000 Oe field.

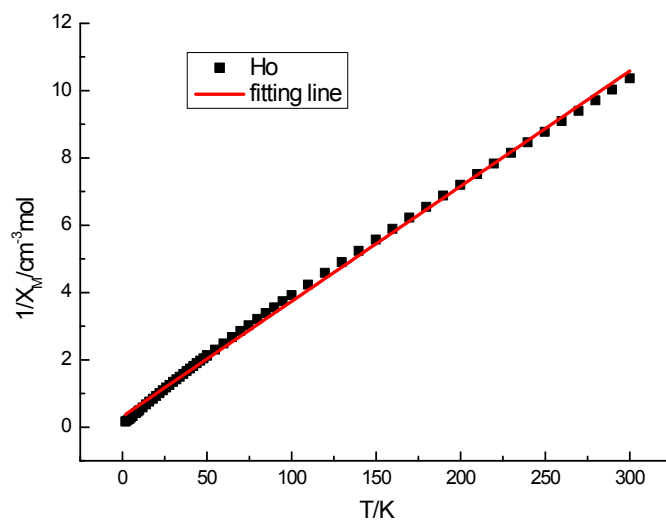

**Fig. S25** The plot of  $1/\chi_m$  versus  $T$  for **7** and the linear fit of Curie-Weiss law at 1000 Oe field.

---

## 8. Frequency dependence of in-phase(a) and out-of-phase(b) ac susceptibility of complex 6

(a)

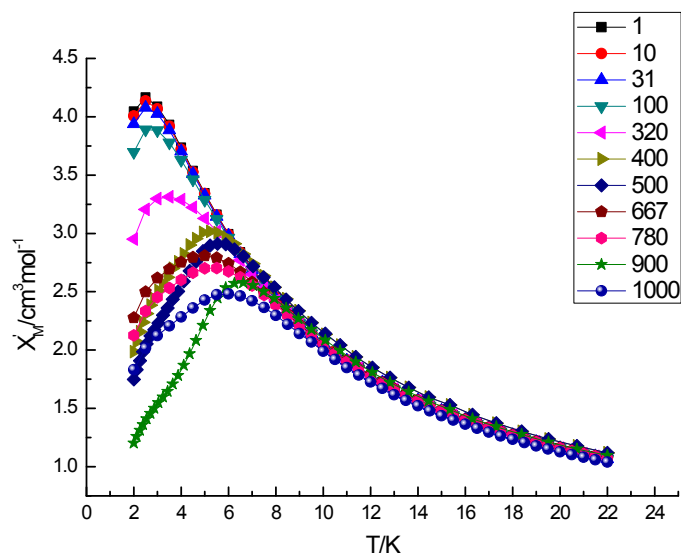

(b)

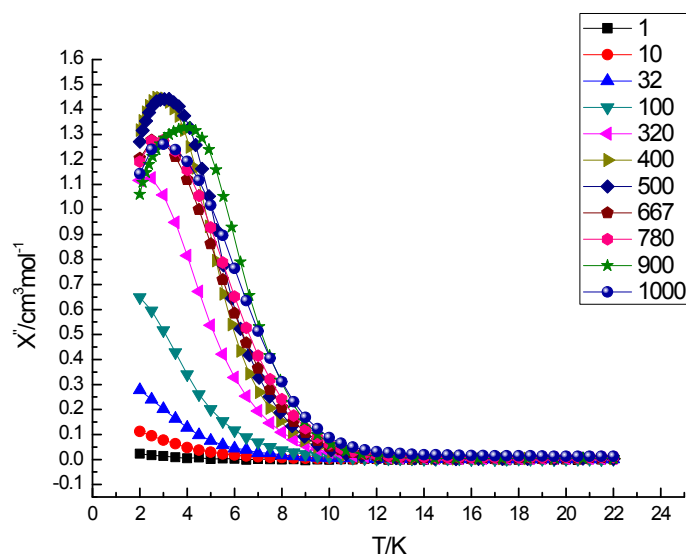

**Fig. S26** Frequency dependence of out-of-phase and in-phase ac susceptibility of complex 6.

## 9. Parameters obtained from fitting the Cole-Cole plots of complex 6

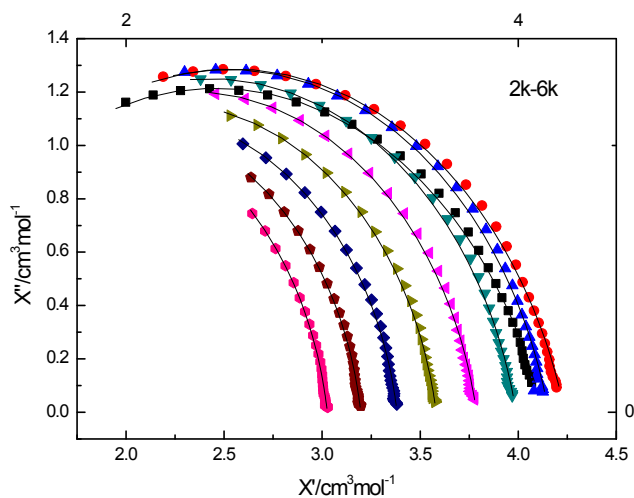

**Fig. S27** Cole-Cole plots measured at 2.0-6.0 K for **6** under a zero-dc field; the solid lines are the best fits to the experimental data.

**Table S10** Parameters from the fitting of the Cole-Cole plots of **6**.

| Temperature / K | $\chi_s / \text{cm}^3 \text{mol}^{-1} \text{K}$ | $\chi_T / \text{cm}^3 \text{mol}^{-1} \text{K}$ | $\tau / \text{s}$ | $\alpha$     |
|-----------------|-------------------------------------------------|-------------------------------------------------|-------------------|--------------|
| 2               | 0.794528E+00                                    | 0.412323E+01                                    | 0.267376E-03      | 0.197246E+00 |
| 2.5             | 0.848915E+00                                    | 0.423759E+01                                    | 0.233009E-03      | 0.173218E+00 |
| 3               | 0.880567E+00                                    | 0.415511E+01                                    | 0.204413E-03      | 0.152869E+00 |
| 3.5             | 0.877305E+00                                    | 0.398921E+01                                    | 0.175215E-03      | 0.138299E+00 |
| 4               | 0.870698E+00                                    | 0.378721E+01                                    | 0.147250E-03      | 0.121929E+00 |
| 4.5             | 0.835641E+00                                    | 0.358134E+01                                    | 0.120012E-03      | 0.108843E+00 |
| 5               | 0.757818E+00                                    | 0.338197E+01                                    | 0.945000E-04      | 0.996718E-01 |
| 5.5             | 0.625953E+00                                    | 0.319693E+01                                    | 0.717889E-04      | 0.951888E-01 |
| 6               | 0.412082E+00                                    | 0.302635E+01                                    | 0.520990E-04      | 0.941584E-01 |



---

## 10. Plot of $\ln\tau$ vs $1/T$ of **6**

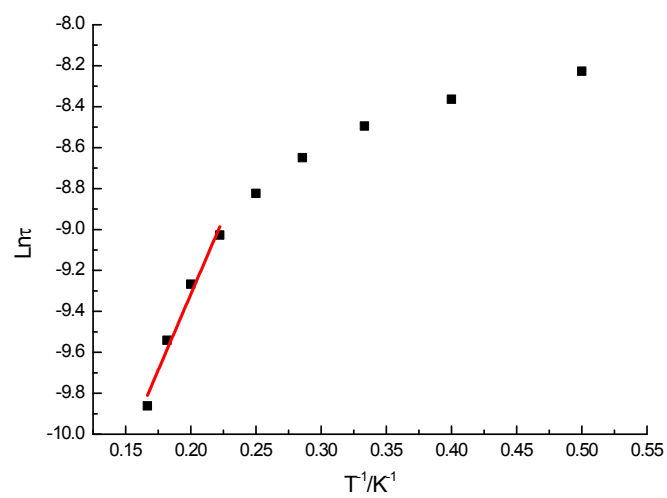

**Fig. S28**  $\ln\tau$  versus  $T^{-1}$  plots for **6**. The red line represents the fit to the Arrhenius law.

## 11. Dy<sub>2</sub> SMMs reported in the literature

**Table. S11** Some examples of nine-coordinated Dy<sub>2</sub> SMMs bearing [Dy<sub>2</sub>O<sub>2</sub>] units

| Complexes                                                                                                                                                          | Ligand                                                                                                                                                                     | configurations                                    | dDy...Dy<br>(Å)        | Dy–O–Dy<br>bond angle (°) | Magnetic<br>properties U <sub>eff</sub><br>(K), τ <sub>0</sub> (s),                         | Ref.         |
|--------------------------------------------------------------------------------------------------------------------------------------------------------------------|----------------------------------------------------------------------------------------------------------------------------------------------------------------------------|---------------------------------------------------|------------------------|---------------------------|---------------------------------------------------------------------------------------------|--------------|
| [Dy <sub>2</sub> L <sub>2</sub> (NO <sub>3</sub> ) <sub>4</sub> ]                                                                                                  | 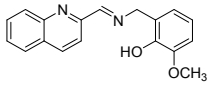                                                                                          | 9, bicapped<br>dodecahedron<br>geometry           | 3.7226(8)              | 106.6(3)                  | U <sub>eff</sub> = 14.8<br>τ <sub>0</sub> = 4.64 × 10 <sup>-6</sup><br>antiferromagnetic    | This<br>work |
| [Dy <sub>2</sub> L <sub>2</sub> (NO <sub>3</sub> ) <sub>2</sub> (OAc) <sub>4</sub> ]<br>·2CH <sub>3</sub> CN                                                       |                                                                                           | 9, monocapped<br>square antiprism                 | 3.8454(9)              | 104.95(11)                | ---<br>antiferromagnetic                                                                    | 1(a)         |
| [Dy <sub>2</sub> (LH) <sub>2</sub> (μ <sub>2</sub> -Piv-<br>κ <sup>2</sup> O,O') <sub>2</sub> (NO <sub>3</sub> <sup>-</sup><br>κ <sup>2</sup> O,O') <sub>2</sub> ] | <br>     | 9, distorted<br>monocapped<br>square antiprism    | 3.671(7)               | 100.39(7)                 | U <sub>eff</sub> = 40<br>τ <sub>0</sub> = 6.5 × 10 <sup>-5</sup><br>antiferromagnetic       | 1(b)         |
| [Dy <sub>2</sub> (Mq) <sub>4</sub> (NO <sub>3</sub> ) <sub>6</sub> ]                                                                                               |                                                                                          | 9, distorted<br>trigonal prism                    | 3.914(5)               | 112.26(1)                 | U <sub>eff</sub> = 40.01<br>τ <sub>0</sub> = 5.44 × 10 <sup>-6</sup><br>antiferromagnetic   | 1 (c)        |
| [Dy <sub>2</sub> (1-tza) <sub>4</sub> (NO <sub>3</sub> ) <sub>2</sub><br>(bipy) <sub>2</sub> ]                                                                     | <br> | 9, monocapped<br>square antiprism                 | 4.0054(2)              | 105.573(63)               | U <sub>eff</sub> = 41.8<br>τ <sub>0</sub> = 2.0 × 10 <sup>-9</sup><br>ferromagnetic         | 1(d)         |
| [Ln <sub>2</sub> (Hhms) <sub>2</sub><br>(NO <sub>3</sub> ) <sub>4</sub> ]·MeCN                                                                                     |                                                                                         | 9, hula-hoop<br>-like geometry                    | 3.6685(3)              | 103.877(15)               | U <sub>eff</sub> = 50.12 ,<br>τ <sub>0</sub> = 1.15 × 10 <sup>-8</sup><br>antiferromagnetic | 1(e)         |
| [Ln(L1) <sub>3</sub> (DMSO)<br>(H <sub>2</sub> O)] <sub>2</sub> [Ln(L2) <sub>3</sub><br>(DMSO)] <sub>n</sub>                                                       | <br> | 9,<br>---                                         | 3.930(4)<br>4.085(5) Å | 105.5(1)<br>114.3(1)      | --<br>antiferromagnetic                                                                     | 1(f)         |
| [Dy <sub>2</sub> (μ <sub>2</sub> -anthc) <sub>4</sub><br>(anthc) <sub>2</sub> (L) <sub>2</sub> ]                                                                   | <br> | 9, distorted<br>monocapped<br>square<br>antiprism | 3.9490(2)              | 105.18(6)                 | U <sub>eff</sub> = 51.2(3)<br>τ <sub>0</sub> = 3.2(1) × 10 <sup>-8</sup><br>ferromagnetic   | 1 (g)        |
| [Dy <sub>2</sub> (μ <sub>2</sub> -anthc) <sub>4</sub><br>(anthc) <sub>2</sub> (L) <sub>2</sub> ]                                                                   | <br> | 9, distorted<br>monocapped<br>square<br>antiprism | 3.9176(4)              | 106.20(10)                | U <sub>eff</sub> = 49.4<br>τ <sub>0</sub> = 4.6(2) × 10 <sup>-8</sup><br>ferromagnetic      | 1(g)         |

|                                                                                                                              |                                                                                     |                                                   |           |           |                                                                                                                                                                      |       |
|------------------------------------------------------------------------------------------------------------------------------|-------------------------------------------------------------------------------------|---------------------------------------------------|-----------|-----------|----------------------------------------------------------------------------------------------------------------------------------------------------------------------|-------|
| [Dy <sub>2</sub> (μ <sub>2</sub> -anthc) <sub>4</sub><br>(anthc) <sub>2</sub> (L) <sub>2</sub> ]                             | 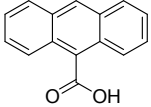   | 9, distorted<br>monocapped<br>square<br>antiprism | 3.9224(6) | 105.18(6) | U <sub>eff</sub> = 31.6<br>τ <sub>0</sub> = 3.4(2) × 10 <sup>-8</sup><br>ferromagnetic                                                                               | 1 (g) |
| [Dy <sub>2</sub> (HL1) <sub>2</sub> (NO <sub>3</sub> ) <sub>4</sub> ]                                                        |    | 9, distorted<br>monocapped<br>square antiprism    | 3.709     | 109.83    | U <sub>eff</sub> = 72.48<br>τ <sub>0</sub> = 8.504 × 10 <sup>-8</sup><br>antiferromagnetic                                                                           | 1 (h) |
| [Dy <sub>2</sub> (L2) <sub>2</sub> (NO <sub>3</sub> ) <sub>4</sub> ]                                                         |    | 9, distorted<br>monocapped<br>square antiprism    | 3.706     | 109.71    | U <sub>eff</sub> = 41.55<br>τ <sub>0</sub> = 8.5 × 10 <sup>-7</sup><br>antiferromagnetic                                                                             | 1 (h) |
| [Dy <sub>2</sub> (HL3) <sub>2</sub> (NO <sub>3</sub> ) <sub>4</sub> ]                                                        |    | 9, distorted<br>monocapped<br>square antiprism    | 3.719     | 110.65    | U <sub>eff</sub> = 6.77<br>τ <sub>0</sub> = 9.12 × 10 <sup>-6</sup><br>ferromagnetic                                                                                 | 1 (h) |
| [Dy <sub>2</sub> (H <sub>3</sub> L) <sub>2</sub><br>(PhCOO) <sub>4</sub> ]·4H <sub>2</sub> O                                 |   | 9, tricapped<br>trigonal prism                    | 3.695     | 101.78    | U <sub>eff</sub> = 42.7<br>τ <sub>0</sub> = 1.37 × 10 <sup>-7</sup><br>antiferromagnetic                                                                             | 1 (i) |
| [Dy <sub>2</sub> (L) <sub>2</sub> (acac) <sub>2</sub><br>(H <sub>2</sub> O)]·2CH <sub>2</sub> Cl <sub>2</sub>                |  | 9, distorted<br>square antiprism                  | 3.84      | 110.8     | U <sub>eff1</sub> = 37<br>τ <sub>01</sub> = 4.2 × 10 <sup>-7</sup><br>U <sub>eff2</sub> = 80<br>τ <sub>02</sub> = 8.3 × 10 <sup>-8</sup><br>ferromagnetic            | 1 (j) |
| [Dy <sub>2</sub> (H <sub>2</sub> L) <sub>2</sub> (μ-piv) <sub>2</sub><br>(piv) <sub>2</sub> ] <sub>2</sub> CHCl <sub>3</sub> |  | 9, distorted<br>monocapped<br>square-antiprism    | 3.633     | 103.02    | U <sub>eff1</sub> = 8.96<br>τ <sub>01</sub> = 8.81 × 10 <sup>-5</sup><br>U <sub>eff2</sub> = 35.51<br>τ <sub>02</sub> = 1.48 × 10 <sup>-6</sup><br>antiferromagnetic | 1 (k) |

---

## References

- 1(a). S. Yang, B. Li, Y. J. Qin, L. Liu and Z. L. Chen, *Zeits. Anorg. Allgem. Chem.*, 2016, **642**, 521-52.
- 1(b). S. Biswas, S. Das, G. Rogez and V. Chandrasekhar, *Eur. J. Inorg. Chem.*, 2016, **2016**, 3322-3329.
- 1(c). F. Yang, Q. Zhou, G. Zeng, G. Li, L. Gao, Z. Shi and S. Feng, *Dalton Trans.*, 2014, **43**, 1238.
- 1(d). Y. B. Lu, X. M. Jiang, Sh. D. Zhu, Z. Y. Du, C. M. Liu, Y. R. Xie and L. X. Liu, *Inorg. Chem.*, 2016, **55**, 3738-3749.
- 1(e). M. Li, H. P. Wu, Sh. Zhang, L. Sun, H. Sh. Ke, Q. Wei, G. Xie, S. P. Chen and S. L. Gao, *Eur. J. Inorg. Chem.*, 2017, 811-819.
- 1(f). O. Khalfaoui, A. Beghidja, J. Long, A. Boussadia, C. Beghidja, Y. Guari and J. Larionova, *Dalton Trans.*, 2017, **46**, 3943-3952.
- 1(g). Y. Wang, C. Han, Y. Zhang, Q. Liu, C. Liu and S. Yin, *Inorg. Chem.*, 2016, **55**, 5578.
- 1(h). Y. Peng, V. Mereacre, A. Baniodeh, Y. Lan, M. Schlageter, G. E. Kostakis and A. K. Powell, *Inorg. Chem.*, 2016, **55**, 68.
- 1(i). H. Ke, S. Zhang, X. Li, Q. Wei, G. Xie, W. Wang and S. Chen, *Dalton Trans.*, 2015, **44**, 21025.
- 1(j). P. Lin, W. Sun, M. Yu, G. Li, P. Yan and M. Murugesu, *Chem. Commun.*, 2011, **47**, 10993.
- 1(k). P. Bag, C. K. Rastogi, S. Biswas, S. Sivakumar, V. Mereacre and V. Chandrasekhar, *Dalton Trans.*, 2015, **44**, 4328.
